# Supplementary material for: Female sex as an independent prognostic factor in the development of oral mucositis during autologous peripheral stem cell transplantation
Source: PubMed Central journal article supplement (PMC7522228; doi:10.1038/s41598-020-72592-5), 2020-09-28
Supplement: 41598_2020_72592_MOESM1_ESM.pdf [file 41598_2020_72592_MOESM1_ESM.pdf]

# Female sex as an independent prognostic factor in the development of oral mucositis during autologous peripheral stem cell transplantation

Enikő Gebri<sup>1</sup>, Attila Kiss<sup>2</sup>, Ferenc Tóth<sup>3</sup>, Tibor Hortobágyi<sup>4,5,6,7</sup>

<sup>1</sup>Department of Dentoalveolar Surgery and Dental Outpatient Care, Faculty of Dentistry, University of Debrecen, Debrecen, Hungary

<sup>2</sup>Department of Haematopoietic Transplantation Centre, Faculty of Medicine, University of Debrecen, Debrecen, Hungary

<sup>3</sup>Department of Biomaterials and Prosthetic Dentistry, Faculty of Dentistry, University of Debrecen, Debrecen, Hungary

<sup>4</sup>MTA-DE Cerebrovascular and Neurodegenerative Research Group, Department of Neurology, Faculty of Medicine, University of Debrecen, Debrecen, Hungary

<sup>5</sup>Institute of Pathology, Faculty of Medicine, University of Szeged, Szeged, Hungary

<sup>6</sup>Department of Old Age Psychiatry, Institute of Psychiatry Psychology and Neuroscience, King's College London, London, UK

<sup>7</sup>Centre for Age-Related Medicine, SESAM, Stavanger University Hospital, Stavanger, Norway

## Corresponding author:

Tibor Hortobágyi *MD PhD DSc FRCPath FDN*

Institute of Pathology, Faculty of Medicine,

University of Szeged

Szeged, Állomás utca 2.

H-6725, Hungary

Email: hortobagyitibor@med.u-szeged.hu

## Supplementary Figure

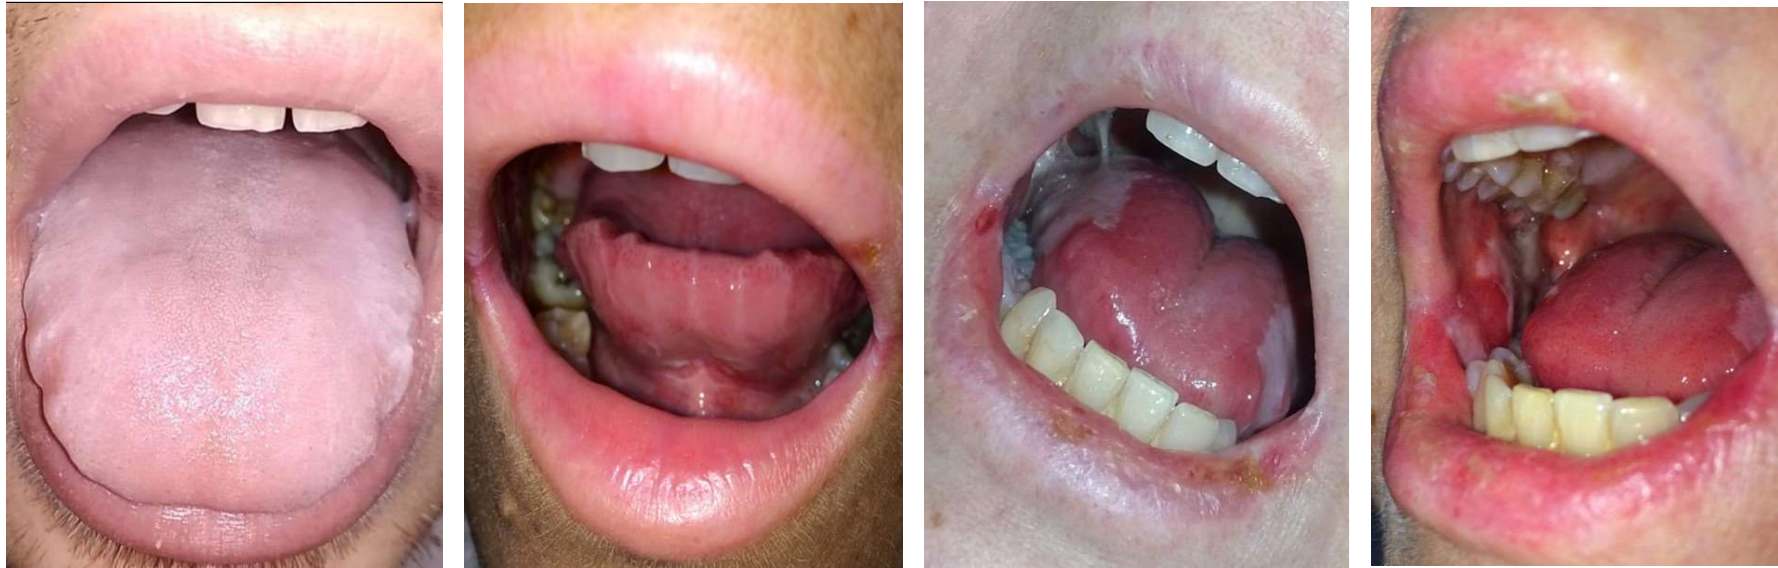

**A**

**B**

**C**

**D**

**Supplementary Figure S1. Representative images of oral mucositis WHO grades I-IV in our patient population. (A) Grade I.** Mild oedema and anaemia, impression of teeth on the lateral borders of the tongue. Patient had soreness. **(B) Grade II.** Impression of teeth on the ventral surface of the tongue with solid mucosal erosions with erythema on the frenulum. Patient could swallow solid food. **(C) Grade III.** Ulcers with extensive erythema on the dorsal surface of the tongue with some solid scale on the lower vermillion. Patient could not swallow solid food. **(D) Grade IV.** Extensive, confluent ulcers in the whole oral cavity. Alimentation was not possible, total parenteral nutrition was necessary.

## Supplementary Tables

**Supplementary Table S1.** Autologous conditioning protocol BEAM I-II.

| BEAM |                   | BEAM I.                 |                    |                            | BEAM II.                |                      |                            |
|------|-------------------|-------------------------|--------------------|----------------------------|-------------------------|----------------------|----------------------------|
| Day  | Agent             | Dose                    | Vehicle            | Duration of administration | Dose                    | Vehicle              | Duration of administration |
| -7   | Carmustine (BCNU) | 300 mg/m <sup>2</sup>   | 500 ml 0.9% NaCl   | 1 h                        | 300 mg/m <sup>2</sup>   | 500 ml 0.9% NaCl     | 1 h                        |
| -6   | Etoposide         | 200 mg/m <sup>2</sup>   | 500 ml 0.9% NaCl   | 1 h                        | 2x100 mg/m <sup>2</sup> | 2 x 500 ml 0.9% NaCl | 2 x 60 min                 |
|      | Cytarabine        | 2x200 mg/m <sup>2</sup> | 2x100 ml 0.9% NaCl | 2x3 h                      | 2x200 mg/m <sup>2</sup> | 2x100 ml 0.9% NaCl   | 2 x 3 h                    |
| -5   | Etoposide         | 200 mg/m <sup>2</sup>   | 500 ml 0.9% NaCl   | 1 h                        | 2x100 mg/m <sup>2</sup> | 2 x 500 ml 0.9% NaCl | 2 x 60 min                 |
|      | Cytarabine        | 2x200 mg/m <sup>2</sup> | 2x100 ml 0.9% NaCl | 2x3 h                      | 2x200 mg/m <sup>2</sup> | 2x100 ml 0.9% NaCl   | 2 x 3 h                    |
| -4   | Etoposide         | 200 mg/m <sup>2</sup>   | 500 ml 0.9% NaCl   | 1 h                        | 2x100 mg/m <sup>2</sup> | 2x500 ml 0.9% NaCl   | 2 x 60 min                 |
|      | Cytarabine        | 2x200 mg/m <sup>2</sup> | 2x100 ml 0.9% NaCl | 2x3 h                      | 2x200 mg/m <sup>2</sup> | 2x100 ml 0.9% NaCl   | 2 x 3 h                    |
| -3   | Etoposide         | 200 mg/m <sup>2</sup>   | 500 ml 0.9% NaCl   | 1 h                        | 2x100 mg/m <sup>2</sup> | 2x500 ml 0.9% NaCl   | 2 x 60                     |
|      | Cytarabine        | 2x200 mg/m <sup>2</sup> | 2x100 ml 0.9% NaCl | 2x3 h                      | 2x200 mg/m <sup>2</sup> | 2x100 ml 0.9% NaCl   | 2 x 3 h                    |
| -2   | Melphalan         | 140 mg/m <sup>2</sup>   | 100 ml 0.9% NaCl   | 0,5-1 h                    | 140 mg/m <sup>2</sup>   | 100 ml 0.9% NaCl     | 30-60 min                  |

**Supplementary Table S2.** Autologous conditioning protocol BEAM III-IV.

| BEAM |                   | BEAM III.               |                    |                            | BEAM IV.              |                  |                            |
|------|-------------------|-------------------------|--------------------|----------------------------|-----------------------|------------------|----------------------------|
| Day  | Agent             | Dose                    | Vehicle            | Duration of administration | Dose                  | Vehicle          | Duration of administration |
| -7   | Carmustine (BCNU) | 300 mg/m <sup>2</sup>   | 500 ml 0.9% NaCl   | 1 h                        | 300 mg/m <sup>2</sup> | 500 ml 0.9% NaCl | 1 h                        |
| -6   | Etoposide         | 200 mg/m <sup>2</sup>   | 500 ml 0.9% NaCl   | 1 h                        | 200 mg/m <sup>2</sup> | 500 ml 0.9% NaCl | 1 h                        |
|      | Cytarabine        | 2×200 mg/m <sup>2</sup> | 2×100 ml 0.9% NaCl | 2×3 h                      | 200 mg/m <sup>2</sup> | 100 ml 0.9% NaCl | 3 h                        |
| -5   | Etoposide         | 200 mg/m <sup>2</sup>   | 500 ml 0.9% NaCl   | 1 h                        | 200 mg/m <sup>2</sup> | 500 ml 0.9% NaCl | 1 h                        |
|      | Cytarabine        | 2×200 mg/m <sup>2</sup> | 2×100 ml 0.9% NaCl | 2×3 h                      | 200 mg/m <sup>2</sup> | 100 ml 0.9% NaCl | 3 h                        |
| -4   | Etoposide         | 200 mg/m <sup>2</sup>   | 500 ml 0.9% NaCl   | 1 h                        | 200 mg/m <sup>2</sup> | 500 ml 0.9% NaCl | 1 h                        |
|      | Cytarabine        | 2×200 mg/m <sup>2</sup> | 2×100 ml 0.9% NaCl | 2×3 h                      | 200 mg/m <sup>2</sup> | 100 ml 0.9% NaCl | 3 h                        |
| -5   | Etoposide         | 200 mg/m <sup>2</sup>   | 500 ml 0.9% NaCl   | 1 h                        | 200 mg/m <sup>2</sup> | 500 ml 0.9% NaCl | 1 h                        |
|      | Cytarabine        | 2×200 mg/m <sup>2</sup> | 2×100 ml 0.9% NaCl | 2×3 h                      | 200 mg/m <sup>2</sup> | 100 ml 0.9% NaCl | 3 h                        |
| -2   | Melphalan         | 140 mg/m <sup>2</sup>   | 100 ml 0.9% NaCl   | 0,5-1 h                    | 140 mg/m <sup>2</sup> | 100 ml 0.9% NaCl | 0.5-1 h                    |

**Supplementary Table S3.** Autologous conditioning protocol R-BEAM; Z-BEAM

| R-BEAM |                       |                         |                    |                            | Z-BEAM |                   |                         |                    |                            |
|--------|-----------------------|-------------------------|--------------------|----------------------------|--------|-------------------|-------------------------|--------------------|----------------------------|
| Day    | Agent                 | Dose                    | Vehicle            | Duration of administration | Day    | Agent             | Dose                    | Vehicle            | Duration of administration |
| -8     | Rituximab (or day -7) | 375 mg/m <sup>2</sup>   | 500 ml 0.9% NaCl   | 3 h                        | -21    | Rituximab         | 375 mg/m <sup>2</sup>   | 500 ml 0.9% NaCl   | 3 h                        |
| -7     | Carmustine (BCNU)     | 300 mg/m <sup>2</sup>   | 500 ml 0.9% NaCl   | 1 h                        | -14    | Zevalin           | 3,8 MBq/m <sup>2</sup>  | -                  | bolus                      |
|        | Rituximab (or day -8) | 375 mg/m <sup>2</sup>   | 500 ml 0.9% NaCl   | 3 h                        | -7     | Carmustine (BCNU) | 300 mg/m <sup>2</sup>   | 500 ml 0.9% NaCl   | 1 h                        |
| -6     | Etoposide             | 200 mg/m <sup>2</sup>   | 500 ml 0.9% NaCl   | 1h                         | -6     | Etoposide         | 200 mg/m <sup>2</sup>   | 500 ml 0.9% NaCl   | 1 h                        |
|        | Cytarabine            | 2×200 mg/m <sup>2</sup> | 2×100 ml 0.9% NaCl | 2×3 h                      |        | Cytarabine        | 2×200 mg/m <sup>2</sup> | 2×100 ml 0.9% NaCl | 2×3 h                      |
| -5     | Etoposide             | 200 mg/m <sup>2</sup>   | 500 ml 0.9% NaCl   | 1 h                        | -5     | Etoposide         | 200 mg/m <sup>2</sup>   | 500 ml 0.9% NaCl   | 1 h                        |
|        | Cytarabine            | 2×200 mg/m <sup>2</sup> | 2×100 ml 0.9% NaCl | 2×3 h                      |        | Cytarabine        | 2×200 mg/m <sup>2</sup> | 2×100 ml 0.9% NaCl | 2×3 h                      |
| -4     | Etoposide             | 200 mg/m <sup>2</sup>   | 500 ml 0.9% NaCl   | 1 h                        | -4     | Etoposide         | 200 mg/m <sup>2</sup>   | 500 ml 0.9% NaCl   | 1 h                        |
|        | Cytarabine            | 2×200 mg/m <sup>2</sup> | 2×100 ml 0.9% NaCl | 2×3 h                      |        | Cytarabine        | 2×200 mg/m <sup>2</sup> | 2×100 ml 0.9% NaCl | 2×3 h                      |
| -3     | Etoposide             | 200 mg/m <sup>2</sup>   | 500 ml 0.9% NaCl   | 1 h                        | -3     | Etoposide         | 200 mg/m <sup>2</sup>   | 500 ml 0.9% NaCl   | 1 h                        |
|        | Cytarabine            | 2×200 mg/m <sup>2</sup> | 2×100 ml 0.9% NaCl | 2×3 h                      |        | Cytarabine        | 2×200 mg/m <sup>2</sup> | 2×100 ml 0.9% NaCl | 2×3 h                      |
| -2     | Melphalan             | 140 mg/m <sup>2</sup>   | 100 ml 0.9% NaCl   | 0,5-1 h                    | -2     | Melphalan         | 140 mg/m <sup>2</sup>   | 100 ml 0.9% NaCl   | 0,5-1 h                    |

R-BEAM-Adcetris: Adcetris completion (Brentuximab-vedotin) in case of therapy refractory or relapsed Hodgkin's lymphoma in one infusion before R-BEAM conditioning 1.8 mg/kg iv. in 30 minutes.

**Supplementary Table S4.** Autologous conditioning protocol R-BEAM; Z-BEAM

| <b>MELPHALAN</b> |              |                       |                  |                                   |
|------------------|--------------|-----------------------|------------------|-----------------------------------|
| <b>Day</b>       | <b>Agent</b> | <b>Dose</b>           | <b>Vehicle</b>   | <b>duration of administration</b> |
| -2               | melphalan    | 200 mg/m <sup>2</sup> | 500 ml 0.9% NaCl | max. 1h                           |
| -2               | melphalan    | 140 mg/m <sup>2</sup> | 500 ml 0.9% NaCl | max. 1h                           |

By individual consideration only. Primarily in multiple myeloma (MM) patients in poor clinical condition, ≥65y with 30ml/min GFR in secondary transplantation.
